# Supplementary material
Source: publisher site journal article supplement (https://www.dovepress.com/article/586150)
Supplement: Supplementary file 1 [file 586150%20Revised%20Appendix%201.pdf]

## Appendix 1. Oxford Centre for Evidence-Based Medicine

### Table S1. Levels of Evidence (March 2009)

| Level     | Therapy / Prevention,<br>Aetiology / Harm                                                                        | Prognosis                                                                                                                            | Diagnosis                                                                                                                    | Differential diagnosis /<br>symptom prevalence<br>study                                                          | Economic and decision<br>analyses                                                                                                                                 |
|-----------|------------------------------------------------------------------------------------------------------------------|--------------------------------------------------------------------------------------------------------------------------------------|------------------------------------------------------------------------------------------------------------------------------|------------------------------------------------------------------------------------------------------------------|-------------------------------------------------------------------------------------------------------------------------------------------------------------------|
| <b>1a</b> | SR (with homogeneity) of RCTs                                                                                    | SR (with homogeneity) of inception cohort studies; CDR validated in different populations                                            | SR (with homogeneity) of Level 1 diagnostic studies; CDR with 1b studies from different clinical centres                     | SR (with homogeneity) of prospective cohort studies                                                              | SR (with homogeneity) of Level 1 economic studies                                                                                                                 |
| <b>1b</b> | Individual RCT (with narrow Confidence Interval)                                                                 | Individual inception cohort study with > 80% follow-up; CDR validated in a single population                                         | Validating cohort study with good reference standards; or CDR tested within one clinical centre                              | Prospective cohort study with good follow-up                                                                     | Analysis based on clinically sensible costs or alternatives; systematic review(s) of the evidence; and including multi-way sensitivity analyses                   |
| <b>1c</b> | All or none                                                                                                      | All or none case-series                                                                                                              | Absolute SpPins and SnNouts                                                                                                  | All or none case-series                                                                                          | Absolute better-value or worse-value analyses                                                                                                                     |
| <b>2a</b> | SR (with homogeneity) of cohort studies                                                                          | SR (with homogeneity) of either retrospective cohort studies or untreated control groups in RCTs                                     | SR (with homogeneity) of Level >2 diagnostic studies                                                                         | SR (with homogeneity) of 2b and better studies                                                                   | SR (with homogeneity) of Level >2 economic studies                                                                                                                |
| <b>2b</b> | Individual cohort study (including low quality RCT; e.g., <80% follow-up)                                        | Retrospective cohort study or follow-up of untreated control patients in an RCT; Derivation of CDR or validated on split-sample only | Exploratory cohort study with good reference standards; CDR after derivation, or validated only on split-sample or databases | Retrospective cohort study, or poor follow-up                                                                    | Analysis based on clinically sensible costs or alternatives; limited review(s) of the evidence, or single studies; and including multi-way sensitivity analyses   |
| <b>2c</b> | "Outcomes" Research; Ecological studies                                                                          | "Outcomes" Research                                                                                                                  |                                                                                                                              | Ecological studies                                                                                               | Audit or outcomes research                                                                                                                                        |
| <b>3a</b> | SR (with homogeneity) of case-control studies                                                                    |                                                                                                                                      | SR (with homogeneity) of 3b and better studies                                                                               | SR (with homogeneity) of 3b and better studies                                                                   | SR (with homogeneity) of 3b and better studies                                                                                                                    |
| <b>3b</b> | Individual Case-Control Study                                                                                    |                                                                                                                                      | Non-consecutive study; or without consistently applied reference standards                                                   | Non-consecutive cohort study, or very limited population                                                         | Analysis based on limited alternatives or costs, poor quality estimates of data, but including sensitivity analyses incorporating clinically sensible variations. |
| <b>4</b>  | Case-series (and poor quality cohort and case-control studies)                                                   | Case-series (and poor quality prognostic cohort studies)                                                                             | Case-control study, poor or non-independent reference standard                                                               | Case-series or superseded reference standards                                                                    | Analysis with no sensitivity analysis                                                                                                                             |
| <b>5</b>  | Expert opinion without explicit critical appraisal, or based on physiology, bench research or "first principles" | Expert opinion without explicit critical appraisal, or based on physiology, bench research or "first principles"                     | Expert opinion without explicit critical appraisal, or based on physiology, bench research or "first principles"             | Expert opinion without explicit critical appraisal, or based on physiology, bench research or "first principles" | Expert opinion without explicit critical appraisal, or based on economic theory or "first principles"                                                             |

SR: Systematic review; CDR: Clinical Decision Rule (These are algorithms or scoring systems that lead to a prognostic estimation or a diagnostic category.); SpPins and SnNouts: An "Absolute SpPin" is a diagnostic finding whose Specificity is so high that a Positive result rules-in the diagnosis. An "Absolute SnNout" is a diagnostic finding whose Sensitivity is so high that a Negative result rules-out the diagnosis.

Table S2 Grades of Recommendation

| Grade    | Conditions                                                                        |
|----------|-----------------------------------------------------------------------------------|
| <b>A</b> | consistent level 1 studies                                                        |
| <b>B</b> | consistent level 2 or 3 studies or extrapolations from level 1 studies            |
| <b>C</b> | level 4 studies or extrapolations from level 2 or 3 studies                       |
| <b>D</b> | level 5 evidence or troublingly inconsistent or inconclusive studies of any level |

“Extrapolations” are where data is used in a situation that has potentially clinically important differences than the original study situation.

Notes: The above evidence level and grading of recommendations refer to the Oxford Centre for Evidence-Based Medicine ([www.cebm.ox.ac.uk](http://www.cebm.ox.ac.uk)) .
